# Supplementary material
Source: bioRxiv or medRxiv preprint supplement (https://medrxiv.org/highwire/filestream/93444/field_highwire_adjunct_files/1/2020.08.15.20174284-2.pdf)
Supplement: Supplementary file [file 2020.08.15.20174284-2.pdf]

Left-Cerebellum-Cortex  
Left-Thalamus-Proper  
Left-Caudate  
Left-Putamen  
Left-Pallidum  
Brain-Stem  
Left-Hippocampus  
Left-Amygdala  
Left-Accumbens-area  
Right-Cerebellum-Cortex  
Right-Thalamus-Proper  
Right-Caudate  
Right-Putamen  
Right-Pallidum  
Right-Hippocampus  
Right-Amygdala  
Right-Accumbens-area  
ctx-lh-caudalanteriorcingulate  
ctx-lh-caudalmiddlefrontal  
ctx-lh-cuneus  
ctx-lh-entorhinal  
ctx-lh-fusiform  
ctx-lh-inferiorparietal  
ctx-lh-inferiortemporal  
ctx-lh-isthmuscingulate  
ctx-lh-lateraloccipital  
ctx-lh-lateralorbitofrontal  
ctx-lh-lingual  
ctx-lh-medialorbitofrontal  
ctx-lh-middletemporal  
ctx-lh-parahippocampal  
ctx-lh-paracentral  
ctx-lh-parsopercularis  
ctx-lh-parsorbitalis  
ctx-lh-parstriangularis  
ctx-lh-pericalcarine  
ctx-lh-postcentral  
ctx-lh-posteriorcingulate  
ctx-lh-precentral  
ctx-lh-precuneus  
ctx-lh-rostralanteriorcingulate  
ctx-lh-rostralmiddlefrontal  
ctx-lh-superiorfrontal  
ctx-lh-superiorparietal  
ctx-lh-superiortemporal  
ctx-lh-supramarginal  
ctx-lh-frontalpole  
ctx-lh-temporalpole  
ctx-lh-transversetemporal  
ctx-lh-insula  
ctx-rh-caudalanteriorcingulate  
ctx-rh-caudalmiddlefrontal  
ctx-rh-cuneus  
ctx-rh-entorhinal

ctx-rh-fusiform  
ctx-rh-inferiorparietal  
ctx-rh-inferiortemporal  
ctx-rh-isthmuscingulate  
ctx-rh-lateraloccipital  
ctx-rh-lateralorbitofrontal  
ctx-rh-lingual  
ctx-rh-medialorbitofrontal  
ctx-rh-middletemporal  
ctx-rh-parahippocampal  
ctx-rh-paracentral  
ctx-rh-parsopercularis  
ctx-rh-parsorbitalis  
ctx-rh-parstriangularis  
ctx-rh-pericalcarine  
ctx-rh-postcentral  
ctx-rh-posteriorcingulate  
ctx-rh-precentral  
ctx-rh-precuneus  
ctx-rh-rostralanteriorcingulate  
ctx-rh-rostralmiddlefrontal  
ctx-rh-superiorfrontal  
ctx-rh-superiorparietal  
ctx-rh-superiortemporal  
ctx-rh-supramarginal  
ctx-rh-frontalpole  
ctx-rh-temporalpole  
ctx-rh-transversetemporal  
ctx-rh-insula  
lh-red nucleus  
lh-substantia nigra  
lh-subthalamic nucleus  
lh-hypothalamus  
rh-red nucleus  
rh-substantia nigra  
rh-subthalamic nucleus  
rh-hypothalamus
